1 **GenEditID: an open-access platform for the high-throughput identification of CRISPR**  
2 **edited cell clones.**

3 Ying Xue<sup>\*1</sup>, YC Loraine Tung<sup>\*2</sup>, Rasmus Siersbaek<sup>3</sup>, Anne Pajon<sup>3</sup>, Chandra SR  
4 Chilamakuri<sup>3</sup>, Ruben Alvarez-Fernandez<sup>3</sup>, Richard Bowers<sup>3</sup>, Jason Carroll<sup>3</sup>, Matthew  
5 Eldridge<sup>3</sup>, Alasdair Russell<sup>3</sup>, Florian T. Merkle<sup>§2,4</sup>

6 1. Department of Endocrinology and Metabolism, Tongji Hospital of Tongji University,  
7 Tongji University School of Medicine, Shanghai 200065, China

8 2. Metabolic Research Laboratories and Medical Research Council Metabolic Diseases  
9 Unit, Wellcome Trust / Medical Research Council Institute of Metabolic Science,  
10 University of Cambridge, Cambridge CB2 0QQ, UK

11 3. Cancer Research UK, Cambridge Institute, University of Cambridge, Cambridge CB2 0RE,  
12 United Kingdom.

13 4. Wellcome Trust / Medical Research Council Cambridge Stem Cell Institute, University of  
14 Cambridge, Cambridge CB2 0QQ, UK

15 \* these authors contributed equally

16 § to whom correspondence should be addressed: [fm436@medschl.cam.ac.uk](mailto:fm436@medschl.cam.ac.uk)

17

18

19

20

21

22

23

24

25 **ABSTRACT**

26 CRISPR-Cas9-based gene editing is a powerful tool to reveal genotype-phenotype  
27 relationships, but identifying cell clones carrying desired edits remains challenging. To  
28 address this issue we developed GenEditID, a flexible, open-access platform for sample  
29 tracking, analysis and integration of multiplexed deep sequencing and proteomic data, and  
30 intuitive plate-based data visualisation to facilitate gene edited clone identification. To  
31 demonstrate the scalability and sensitivity of this method, we identified KO clones in parallel  
32 from multiplexed targeting experiments, and optimised conditions for single base editing  
33 using homology directed repair. GenEditID enables non-specialist groups to expand their  
34 gene targeting efforts, facilitating the study of genetically complex human disease.

35

36 **KEYWORDS**

37 CRISPR-Cas9; gene editing; GWAS; Illumina sequencing; multiplexed; pluripotent stem cell,  
38 LIMS, In-Cell Western

39

40 **BACKGROUND**

41 In the last decade, there has been an explosion of data from the sequencing of human  
42 populations, including genome-wide association studies (GWAS) based on DNA microarrays  
43 and increasingly also whole exomes and whole genomes (1). These studies have revealed  
44 thousands of replicable genetic associations for complex diseases such as diabetes, obesity,  
45 Alzheimer's Disease and breast cancer (2-4). However, mechanistically determining how  
46 these genetic associations contribute to disease remains challenging. Causal evidence  
47 requires careful functional follow-up experiments in model cellular systems, organisms and  
48 eventually in humans, but the traditional approach of characterising one gene at a time  
49 cannot keep pace with the rate of genetic discovery. Furthermore, many associated variants  
50 are non-coding, so the genetic elements responsible for conferring disease risk are often  
51 unclear (5, 6). This issue is exemplified by the fat mass and obesity associated (*FTO*) locus,

52 in which intronic SNPs are strongly associated with obesity, largely due to increased food  
53 intake (7-10) irrespective of gender, age or ethnicity (11, 12). Despite intense study, the  
54 identify of the genetic elements that mediate SNP-associated phenotypes remains  
55 controversial. Some studies suggest that effect on appetite might not be driven by the *FTO*  
56 gene itself as initially thought, but instead by the nearby genes retinitis pigmentosa GTPase  
57 regulator-interacting protein-1 like (*RPGRIP1L*) (13-15), or by iroquois homeobox 3 (*IRX3*)  
58 and iroquois homeobox 5 (*IRX5*) (16, 17). Two powerful tools have recently emerged to help  
59 meet the challenge of uncovering disease mechanisms from the translating the growing  
60 wealth of genetic data: human pluripotent stem cells (hPSCs) and the CRISPR-Cas9 system  
61 (18, 19).

62

63 hPSCs facilitate human disease modelling since they can be indefinitely maintained in a  
64 pluripotent state and can theoretically be differentiated into any cell type in the body,  
65 including disease-relevant cell populations(20, 21). For example, hPSCs cell may be useful  
66 in dissecting which genes near *FTO* contribute to increased food intake since they can be  
67 differentiated into hypothalamic neurons that are pivotally important regulators of food intake  
68 and that express these candidate genes (22, 23). The CRISPR-Cas9 system enables most  
69 regions of the human genome to be efficiently edited. It consists of a ribonucleoprotein  
70 (RNP) complex, including a Cas9 nuclease that is targeted to specific regions of DNA by an  
71 approximately 20-base sequence within a guide RNA (gRNA) by forming a DNA-RNA hybrid  
72 with complementary DNA sequences (24-26). For Cas9 isolated from the bacterium  
73 *Streptococcus Pyogenes*, if the targeted DNA sequence contains a 3' protospacer adjacent  
74 motif (PAM) of NGG, Cas9 will cleave the targeted DNA 3 bases 5' to the start of the PAM  
75 site (27, 28) to create a double-strand break (DSB). The abundance of these PAM motifs in  
76 the genome allows most genes to be targeted by CRISPR-Cas9 (29). DSBs can be repaired  
77 by either the error-prone non-homologous end-joining (NHEJ) pathway which introduces  
78 either frame-preserving or frameshift mutations (30), or by the homology-directed repair  
79 (HDR) mechanisms which can be harnessed to introduce specific DNA alterations (31).

80 A major challenge in the field is how to effectively identify cell clones that have acquired  
81 desired edits. Next-generation sequencing (NGS) of multiplexed pools of amplicons provides  
82 an attractive solution to this problem, and CRISPR sequence analysis programmes built  
83 around this idea provide visualisations of mutation types (32-34) and frequency (35).  
84 However, to the best of our knowledge, there are no resources that provide a complete  
85 platform for amplicon generation and barcoding, sample tracking, sequence analysis,  
86 integration of distinct data forms (e.g. proteomic and sequencing), and intuitive visualisation  
87 to empower investigators in non-specialist labs to pursue high-throughput targeted gene  
88 editing.

89 To meet this challenge we developed a semi-automated, open-access, and user-friendly  
90 pipeline that captures the nature and frequency of CRISPR-Cas9-induced gene editing to  
91 identify cell clones of interest, which we call GenEditID. Briefly, targeted regions of interest  
92 are amplified by PCR, barcoded, pooled and sequenced on an Illumina MiSeq. If genes of  
93 interest are expressed in the targeted cell type, protein expression data can be integrated  
94 with sequencing data to support the identification of knockout (KO) clones. Results are  
95 graphically represented to reflect the physical location of the clone on the plate, facilitating  
96 rapid and accurate clone recovery and further analysis. Using the *FTO* locus as an example,  
97 we provide a roadmap by which the community can use GenEditID to rapidly, affordably, and  
98 systematically explore genotype-phenotype relationships for genetically complex human  
99 diseases. Furthermore, we demonstrate how the sequencing depth and multiplexed nature  
100 of this approach enables targeted gene editing approaches to be optimised in cell  
101 populations before embarking on the laborious process of gene targeting and clone picking,  
102 allowing users to predict how many clones need to be picked in order to recover their clone  
103 of interest.

104

105 **RESULTS**

106 We aimed to develop GenEditID to combine the strengths of laboratory information  
107 management system (LIMS)-based sample management with open-access customisable  
108 bioinformatic pipelines and a user-friendly graphical data display to facilitate the proliferation  
109 of parallel cellular gene editing experiments by non-specialist groups (Fig.1). GenEditID was  
110 implemented in Python, allowing basic experimental design and relevant sample details to  
111 readily be incorporated into a genome editing report. To establish this platform, we first  
112 turned to the estrogen receptor positive (ER+) breast cancer cell line MCF7, which is widely  
113 used to study breast cancer biology and is amenable to CRISPR-Cas9 gene editing (36). We  
114 targeted the oncogene signal transducer and activator of transcription 3 (*STAT3*), which is  
115 expressed in MCF7 cells but remains largely inactive in the absence of extracellular stimuli  
116 that trigger phosphorylation of tyrosine 705 (37). This approach allowed us to assess gene  
117 editing efficiency and identify successfully edited clones without confounding factors such as  
118 changes in the cell proliferation rate in response to deletion of *STAT3*, and to integrate  
119 mutually supportive data from protein expression and DNA sequencing.

120 We designed four different gRNAs targeting exons 3 and 4 of *STAT3* (Fig. 2A,  
121 Supplementary Fig. S1A) that we cloned into a Cas9 expressing vector (pSpCas9(BB)-2A-  
122 GFP, PX458, Addgene#48138) (38), and separately transfected into a clonally-derived  
123 MCF7 cell line stably transfected with a vector expressing mStrawberry and luciferase  
124 (pCLIP-EF1a-LS). The use of a clonal cell line limited confounding factors associated with  
125 comparing clonal edited cell lines with a polyclonal parental cell line. Successfully  
126 transfected GFP+ single cells were distributed into 96 well plates using FACS, and clonal  
127 colonies were allowed to form. Viable colonies were consolidated into a new set of 96 well  
128 plates in duplicate, enabling one plate to be used to expand the clone for future use and the  
129 second plate to be used for clone characterisation. We first characterised 107 clones of cells  
130 by immunostaining wells with a *STAT3*-specific antibody, as well as a total cell stain used to  
131 normalise for differences in cell confluence in a high-throughput Li-Cor In-Cell Western (Fig.  
132 2B) (39). Based on ratios of fluorescence intensity in channels corresponding to *STAT3*

133 abundance and total cell staining, we identified gene-edited clones with reduced STAT3  
134 immunostaining relative to non-edited controls (Fig. 2B, white arrow). We validated loss of  
135 STAT3 protein for 8 such clones of interest using SDS-PAGE Western blotting  
136 (Supplementary Fig. S1B). Next, we tested whether the low protein expression observed in  
137 some targeted clones was due to CRISPR-Cas9-induced frameshifts in the *STAT3* genomic  
138 sequence and not spurious effects due to stress or clonal selection.

139 To address this question, we extracted genomic DNA from 20 clones with low STAT3 protein  
140 expression and then PCR amplified and Sanger sequenced amplicons across the *STAT3*  
141 guide RNA target. We found that these clones indeed contained frameshift mutations  
142 disrupting both wild-type alleles of *STAT3* (Supplementary Fig. S1C). However, gene edited  
143 clones are often mosaic for a large number of alleles due to the persistence of CRISPR-  
144 Cas9 upon plasmid transfection (40, 41), and less abundant alleles are difficult to detect by  
145 Sanger sequencing. Therefore, we sought to test the extent to which sequencing information  
146 predicts STAT3 protein expression status across all clones by developing a bioinformatic  
147 pipeline for analysing sequencing reads for many clones in parallel. We reasoned that NGS  
148 would provide ample read depth and accuracy to permit multiplexing and the detection of  
149 low-abundance mutant alleles. We PCR amplified across the guide RNA target sites of  
150 *STAT3* for 96 clones, appended unique barcodes to each clone, pooled the barcoded  
151 amplicons, sequenced the pools, and bioinformatically identified amplicons arising from  
152 distinct cell clones (Supplementary Fig. S2).

153 Across these clones, we observed a median sequencing depth of 14,1322 reads  
154 corresponding to >90% of clones with at least 1000x coverage (Fig. 2C, Supplementary  
155 Table 3, Supplementary Fig. S3A), providing ample power to call mutation allele frequencies  
156 (Supplementary Fig. S3B). We next developed a sequence analysis pipeline to prioritize cell  
157 clones with a high burden of mutations predicted to result in gene loss of function (Fig. 1). To  
158 identify clones likely to have complete or near-complete gene KO, we aligned observed  
159 sequencing traces to the reference genome and quantified the number of reads

160 corresponding to wild-type or variant sequence. We then omitted variants present at less  
161 than 5% abundance, classified remaining variant types (e.g. synonymous, missense, in-  
162 frame indels, frameshift indels) and assigned a score based on the likely consequence of  
163 each variant type on gene function (Fig. 2D, Supplementary Fig. S4, Supplementary Table  
164 3). To determine the total burden of predicted gene-disrupting variants each clone, we  
165 calculated a “gene KO score” based on the aggregated product of mutant allele frequency  
166 and predicted mutation consequence (see Materials and Methods). To visualise both protein  
167 KO scores and gene KO scores, we implemented “heat maps” displaying these data based  
168 on the physical location on the plate for each clone (Fig. 2E and 2F). Note that due to  
169 differences in plate layout, only a subset of wells from plate 1 of this experiment (Fig. 2B)  
170 were submitted for Illumina sequencing (blue circles in Fig. 2E and F). Since some users  
171 may prefer to customise the calculation of KO scores or to integrate recently-developed  
172 methods for calling and classifying mutation types such as AmpliCan (35), we have made  
173 code developed for GenEditID freely available to the community at <https://geneditid.github.io/>  
174 .

175 Next, we reasoned that the integration of gene KO and protein KO scores might provide  
176 stronger evidence to support KO clone selection. To test if mutations called by our sequence  
177 analysis pipeline predicts gene loss of function at the protein level, we compared protein KO  
178 and gene KO scores (Fig. 2G). We found that while control samples and clones identified as  
179 wild-type by sequence analysis tended to have similarly high STAT3 protein abundance,  
180 clones with a high burden of missense and frameshift mutations had significantly lower ( $R^2 =$   
181 0.79,  $P < 0.0001$ ) protein abundance, providing further confirmation of functional gene  
182 ablation. We therefore took the product of gene and protein KO scores to calculate an  
183 “integrated KO score” (Fig. 2H). These results indicate that count-based bioinformatic  
184 analysis of multiplexed NGS data predicts functional gene disruption. While multiple lines of  
185 evidence collected by high-throughput methods would be preferable to prioritise KO clone  
186 selection, this is often not possible since genes of interest may not be strongly expressed in

187 the cell type used as the basis of gene editing, or appropriate antibodies may be lacking. For  
188 example, genes in the *FTO* locus that are implicated in obesity by GWAS are expressed in  
189 hypothalamic cells (42) but not are not highly expressed in hPSCs (23).

190 To test whether KO clones could be readily generated and identified across multiple genes  
191 in parallel in hPSCs, which are more challenging to edit than cancer cell lines (42, 43), we  
192 focused on the *FTO* locus. We first designed gRNAs to introduce double-strand breaks in  
193 early constitutive coding exons of the genes *FTO*, *RPGRIP1L*, *IRX3*, and *IRX5* (Fig. 3A)  
194 which are physically closest to the obesity-associated SNPs (Supplementary Fig. S5A).  
195 Next, we *in vitro*-transcribed four sgRNAs per gene, combined them with purified Cas9  
196 protein, and tested their ability to cut PCR-amplified target DNA *in vitro* to select maximally  
197 active sgRNAs (Supplementary Fig. S5B and S5C). Since persistent Cas9 and sgRNA  
198 expression from plasmids can promote clone mosaicism and off-target activity (40, 41), and  
199 since double CRISPR-Cas9-induced strand breaks are cytotoxic to hPSCs (44, 45), we  
200 nucleofected hPSCs with Cas9 protein complexed with *in vitro* transcribed sgRNA, which  
201 has a half-life of approximately 24 hours in cells (46). hPSCs were re-plated at clonal density  
202 of  $2 \times 10^4$  cells/cm<sup>2</sup> and when colonies emerged we manually picked them into one 96-well  
203 plate per targeted gene. After cells had reached approximately 70% confluence, we  
204 duplicated plates to allow one plate of clones to be frozen down for later use and the other to  
205 provide genomic DNA for our sequencing pipeline. This gene editing workflow is described in  
206 detail elsewhere (47).

207 Next, we PCR-amplified CRISPR target sites for each targeted gene and added distinct  
208 barcodes to each amplicon (Fig. 3B). The unique combination of amplicon and barcode  
209 allowed these 378 samples across 4 distinct amplicons to be combined into a “superpool” as  
210 previously described (48) along with an additional 987 samples from distinct experiments.  
211 We found that across these amplicons, there was no significant bias in sequencing coverage  
212 imposed by the barcodes (Supplementary Fig. S5D) and that the median sequencing  
213 coverage for these amplicons was 13,689 reads, with 96% of amplicons having 1000 or



214 more reads (Supplementary Table 4). Using the pipeline we had built and tested using data  
215 from *STAT3* targeting, we categorised variant types and calculated gene KO scores to  
216 permit intuitive graphical data display (Fig. 3D), revealing efficient generation of KO clones  
217 for all targeted genes except *RPGRIP1L*. This web-based graphical output allows users to  
218 readily access data to retrieve clones of interest from highlighted wells for further analysis  
219 from remote locations, such as a tissue culture room.

220 In addition to NHEJ-mediated frameshifts, some groups may want to introduce specific  
221 mutations to test the consequence of disease-associated genetic variants or other functional  
222 elements. To complement NHEJ-mediated KO of *FTO*, we also introduced a single base  
223 mutation to introduce a premature stop codon into an early coding exon of *FTO* by HDR. To  
224 this end, we designed a single-stranded oligodeoxynucleotide (ssODN) with sequence  
225 complementarity to the target region but carrying the mutation of interest as well as a single-  
226 base mutation to ablate the PAM to eliminate further activity of CRISPR-Cas9 at the edited  
227 allele (Fig. 3E). Since HDR-mediated methods are inefficient, particularly in hPSCs (49), we  
228 harnessed the multiplexing capability and sequencing depth of NGS to optimise conditions  
229 for gene editing.

230 First, we identified optimal guides using *in vitro* cutting assays (Supplementary Fig. S5B).  
231 Next, we nucleofected hPSCs with CRISPR-Cas9 RNP and systematically increased  
232 concentrations of ssODN in biological triplicate. Rather than picking colonies, we extracted  
233 gDNA from the nucleofected hPSC populations, barcoded each treatment condition, and  
234 performed NGS (Fig. 3F). The sequencing depth provided by NGS allowed us to readily  
235 detect the desired edit, revealing that the fraction of correctly edited alleles varied with  
236 ssODN concentration, exceeding 10% allele frequency (approximately 20% of cells) for  
237 some conditions. However, the relationship between ssODN concentration and editing  
238 efficiency was non-linear and appeared to peak at a concentration around 100 pmol ssODN.  
239 This result was confirmed in a second independent experiment (Fig. 3G). We also tested the  
240 hypothesis that biotinylating Cas9 and adding a streptavidin tag to the biotinylating ssODN to

241 physically link the CRISPR-Cas9 complex to the repair oligo would increase rates of HDR,  
242 as has been previously suggested (50). Despite clear Cas9 biotinylation, we found that this  
243 strategy unexpectedly abolished Cas9 activity (Supplementary Fig. S6A) and HDR  
244 (Supplementary Table 5), suggesting that future advances in gene editing could be rapidly  
245 tested and optimised using multiplexed NGS of targeted cell populations.

246

## 247 **DISCUSSION**

248 We present GenEditID as a flexible, open-access pipeline that combines the benefits of a  
249 web-based project management system, a bioinformatic pipeline for data analysis, and a  
250 user-friendly graphical data output that allows efficient selections of clones of potential  
251 interest. Our aim was to reduce the expense, labour, and requisite expertise for groups (or  
252 core facilities) to carry out large-scale gene editing experiments. Here, we discuss the  
253 benefits of GenEditID, areas where it could be further developed, and observations about  
254 the nature of gene editing we observed in our dataset.

255 GenEditID can be readily customised and updated to incorporate new analysis tools (1) to  
256 meet diverse needs. We have therefore published the underlying code in the public domain  
257 <https://geneditid.github.io/>. In particular, the AmpliCount tool we developed was designed to  
258 rapidly analyse thousands of samples in parallel in order to prioritise clones for detailed  
259 follow-up analysis. Since sample information is clearly associated with raw sequencing  
260 traces by our sample tracking system, users can readily extract and further analyse data  
261 from clones of interest at the sequence level (51) or with more specialised bioinformatic tools  
262 (32-35), or incorporate these into GenEditID in lieu of AmpliCount.

263 Our analysis with AmpliCount revealed that most hPSC clones did not have simple  
264 distribution of heterozygous, compound heterozygous, or homozygous edited alleles but  
265 instead had a more complex mixture of alleles across a wide range of frequencies (Fig. 3C,  
266 Supplementary Table 4). These "mixed clones" were most likely generated by CRISPR-Cas9

267 activity that persisted across several cell divisions soon after transfection, as previously  
268 described by several groups (23, 40), despite the fact that we used a ribonucleoprotein  
269 complex of Cas9 and *in vitro*-transcribed sgRNA, which has a much shorter half-life in cells  
270 than plasmid- or virally-encoded Cas9 (46). These findings highlight the need to carefully  
271 analyse NGS data of candidate clones for the presence of mosaicism, and if necessary to  
272 perform a round of subcloning to isolate the desired clone.

273 Another advantage of the multiplexed barcoded amplicon sequencing pipeline of GenEditID  
274 is that the high sequencing depth enables scalable, multiplexed analysis. In this study, we  
275 ran 150 bp paired-end reads (300 cycles) on an Illumina MiSeq. Assuming a minimum  
276 desired read depth of 1000x and one full 96 well plate of clones per gene, >10 or >100  
277 genes could be screened in parallel using the MiSeq nano or standard v2 kits, respectively  
278 at a sequencing cost of less than 10 cents per clone. The establishment of a GenEditID  
279 pipeline at an institution would allow amplicons from different research groups to be pooled,  
280 facilitating cheaper and/or more frequent clone analysis. PCR barcoding by liquid handling  
281 robots could further increase the throughput and decrease the cost of this approach. The  
282 web-based data visualisation tool enables quick analysis of large numbers of clones and  
283 modularly integrates data such as protein expression, cell growth, or allelic frequency (Fig.  
284 1), increasing confidence in clone selection.

285 The scalability of CRISPR-Cas9-based gene editing combined with streamlined clone  
286 selection provides a path to uncover the functional roles of disease-associated genes. This  
287 catalogue of genes is rapidly growing due to the proliferation and increased sample size of  
288 human population sequencing studies (52) In addition, the emergence of new methods for  
289 differentiating hPSCs into diverse cell types promises to enable the interrogation of gene  
290 function in disease-relevant cell populations. To illustrate this point, we targeted genes in the  
291 *FTO* locus, which was the first locus associated with obesity risk loci by GWAS (53, 54). The  
292 locus was subsequently linked to increased energy intake (7-10) but the identity of the  
293 genetic elements at this locus (or elsewhere) that mediate obesity risk remains controversial.

294 Expression QTL studies of human cerebellum associate the obesity-linked SNPs to *IRX3*  
295 expression (17), but since the cerebellum is not an area of brain normally recognised to be  
296 involved in the control of food intake, there is a clear need to analyse brain regions pivotally  
297 important for body weight regulation such as the hypothalamus (55), which can now be  
298 generated from gene-edited hPSCs (22, 23). In this study, we report >80% mutation  
299 efficiency in target genes at the *FTO* locus in hPSCs, of which approximately 50% are  
300 frameshift mutations (Fig. 3C and 3D, Supplementary Table 4), demonstrating both the  
301 efficiency of the gene editing method and the sensitivity of GenEditID to detect these edited  
302 clones. For example, here we detected a clear dose-dependent effect of ssODN  
303 concentration on the efficiency of the targeted introduction of a point mutation in *FTO*. As  
304 CRISPR-Cas9 technology inexorably develops, we propose that new techniques can be  
305 more readily optimised using the tools described here to quantify low-frequency gene editing  
306 events within cell populations.

307

## 308 **CONCLUSION**

309 We developed GenEditID to be a flexible, open-access platform to enable groups to track  
310 their samples, analyse and integrate amplicon sequencing and proteomic data. The  
311 combined data analysis is intuitively visualised to facilitate edited clone identification. The  
312 highly multiplexed approach enables the cost-effective and semi-automated identification of  
313 targeted clones and provides a powerful platform to systematically investigate complex  
314 human diseases in relevant cell types. We further show that GenEditID can be used to  
315 rapidly optimise conditions for editing single bases using homology directed repair. Using  
316 *FTO* as a proof of concept, we show how the platform can help the community to begin to  
317 elucidate the mechanisms by which genetic variants contribute to human disease.

318

## 319 **METHODS**

320 **Cell lines and routine cell culture.** The clonal MCF7 breast cancer cell line expressing  
321 mStrawberry and luciferase (a gift from Scott Lyons, Cold Spring Harbor Laboratory NY) was  
322 grown in DMEM (41966-029, Gibco) supplemented with 10% fetal bovine serum (FBS,  
323 10500-064, Gibco), 50 U/ml penicillin and 50 ug/ml streptomycin (15070-063, Gibco) and  
324 2mM L-glutamine (25030, Gibco) in a humidified 37°C incubator with 5% CO<sub>2</sub>. The HUES9  
325 human embryonic stem cell line was grown on tissue culture plates coated with Geltrex  
326 (Thermo Fisher Scientific) in mTeSR1 media (StemCell Technologies) and maintained in a  
327 humidified 37°C incubator with 5% CO<sub>2</sub>. Medium was changed every 24 hours. Cells were  
328 passaged with 1 mM EDTA for routine maintenance in mTeSR media supplemented with 10  
329 µM ROCK inhibitor Y-27632 dihydrochloride (DNSK International). Please see below for  
330 culture details during gene editing. The absence of mycoplasma was confirmed using a EZ-  
331 PCR Mycoplasma Test Kit (Supplementary Fig. S6B ; Biological Industries, 20-700-20)  
332 following the manufacturer's instructions.

333

334 **CRISPR-Cas9-mediated targeting of STAT3.** Four different gRNAs with high predicted on-  
335 target and low predicted off-target activity targeting exons 3 and 4 of STAT3 (NM\_139276)  
336 were designed using deskgen ([www.deskgen.com](http://www.deskgen.com)). These guides were ordered from Sigma  
337 Aldrich and cloned into pSpCas9(BB)-2A-GFP (PX458, Addgene #48138). A stably  
338 transfected clonal MCF7 cell line expressing mStrawberry and luciferase (pCLIIP-EF1-LS)  
339 was transfected with these vectors. Successfully transfected GFP+ cells were purified by  
340 FACS into 6 well plates and allowed to recover for ~1 week. Single mStrawberry+ cells  
341 (since the transfection with CRISPR-Cas9 vector was a transient transfection, the cells had  
342 lost GFP expression at this point) were then distributed into multiple 96 well plates by FACS.  
343 After ~3 weeks, viable clonal colonies were consolidated on new 96 well plates in duplicate,  
344 so that one plate could be used for characterising clones and the other plate could be used  
345 to expand clones for later use. All sgRNAs and primer sequences are provided in  
346 Supplementary Table 1.

347

348 **In-Cell Western for STAT3.** Five days after seeding, the test plate used for clone  
349 characterisation was fixed in 3.7% formaldehyde for 20 min at room temperature and  
350 subjected to In-cell western using a STAT3-specific antibody (9139, Cell Signalling). Briefly,  
351 cells were permeabilised by washing 5x in TBS + 0.1% Triton X-100 (Fisher Scientific,  
352 BP151-100) for 5 min at room temperature and then blocked for 1 h with TBS Odyssey  
353 blocking buffer (Li-Cor biosciences, 927-50000). Cells were then incubated with a STAT3  
354 antibody (9139, Cell Signalling) in blocking buffer + 0.1% tween-20 (P1379, Sigma Aldrich)  
355 for 1-2 hours at room temperature or overnight at 4°C on a shaker. After washing 5x with  
356 TBS+0.1% Tween-20 for 5 min, cells were incubated with secondary antibody (Goat anti-  
357 mouse, 926-32210, Li-Cor) and a 1:500 dilution of CellTag 700 total cell stain (Li-Cor, 926-  
358 41090) for 45min at room temperature on a shaker (50 ul/well). Cells were then washed 4x  
359 with TBS+0.1% Tween-20 for 5 min followed by a final wash in TBS. Plates were then  
360 analysed using the Odyssey CLx Imaging System (Li-Cor) to obtain measurements for both  
361 total cell confluency and STAT3 expression. Signal intensity for STAT3 staining (green  
362 channel) was then divided by the signal intensity for the CellTag 700 stain (red channel) for  
363 each well to determine a STAT3 abundance ratio, and the resulting ratios were normalised  
364 to produce a “protein KO score”. The mean of negative control values, representing  
365 background staining, was subtracted from all ratios, and the resulting scores were divided by  
366 the mean of positive (non-edited) intensity scores, and the resulting values were subtracted  
367 from 1 so that WT lines would have scores near 0 and KO lines would have scores near 1.

368

369 **Production and testing of *in vitro*-transcribed gRNA.** CRISPR guide RNAs were  
370 designed to target early coding gene regions in constitutive exons of genes in the *FTO* locus  
371 using Wellcome Trust Sanger Institute Genome Editing tool  
372 (<http://www.sanger.ac.uk/htgt/wge/>) and the Feng Zhang laboratory's CRISPR design tool  
373 (<http://crispr.mit.edu/>) to maximise on-target and minimize off-target activity. For the  
374 production of gRNAs, a 120 nucleotide oligo (Integrated DNA Technologies Inc.) including  
375 the SP6 promoter, gRNA sequences, and scaffold region were used as a template for

376 synthesis by *in vitro* transcription using the MEGAscript SP6 kit (Thermo Fisher, AM1330) as  
377 previously described [19]. The resulting sgRNAs were purified using the E.Z.N.A miRNA  
378 purification kit (Omega Bio-tek, R7034-01), eluted in RNase-free water, and stored at -80°C.  
379 Since gRNAs vary in their efficacy, we designed at least four gRNAs per gene of interest and  
380 tested their relative cutting efficiencies in *in vitro* cleavage assays as previously described  
381 (47). We selected the gRNAs that showed activity at the lowest Cas9 concentration at each  
382 target gene for transfection in the hPSC cells. All sgRNAs and primer sequences are  
383 provided in Supplementary Table 1.

384

385 **Cas9 protein production.** Cas9 proteins were purified by the laboratory of Marko Hyvönen  
386 (University of Cambridge) from *E. coli* expressing *Streptococcus Pyogenes* Cas9 carrying a  
387 C-terminal fusion to a hexa-histidine tag from the pET-28b-Cas9-His plasmid (Addgene  
388 <http://www.addgene.org/47327>) (56). The soluble Cas9 protein was purified by a  
389 combination of nickel affinity and cation exchange chromatographies. The purified protein  
390 was concentrated to approximately 30 µM (4.8 mg/ml) in 20 mM HEPES pH 7.5, 500 mM  
391 KCl and 1% sucrose buffer and flash frozen for storage at -80°C.

392

393 **CRISPR-Cas9 ribonucleoprotein (RNP) complex-mediated editing in hESCs.** For gene  
394 knockout by NHEJ, 3 µg purified sgRNA was mixed with 4 µg Cas9 protein (final volume <5  
395 µl) for 10 min at room temperature to form stable RNP complexes. The complex was then  
396 transferred to a 20 µl single-cell suspension of  $2 \times 10^5$  hESCs in P3 nucleofection solution  
397 and electroporated using Amaxa 4D-Nucleofector™ (Lonza) with program CA137.  
398 Transfected cells were seeded onto Geltrex-coated 10 cm dishes containing a pre-warmed  
399 1:1 mix of mTeSR1 and hESC medium containing 20% knockout serum replacement  
400 (KOSR) and 100 ng/ml bFGF, supplemented with 10 µM ROCK inhibitor. Rock Inhibitor was  
401 withdrawn after 24 hours. Single colonies were isolated manually 7-10 days after  
402 transfection and seeded into Geltrex-coated 96-well plates in 1:1 medium plus ROCK

403 inhibitor, which was withdrawn after 24 hours. A total of 96 individual colonies were picked  
404 for each targeted gene, and maintained in 1:1 medium for 10-14 days. Once clones were  
405 close to confluent, each of the 96 well plates were duplicated by EDTA passaging to allow  
406 parallel cell cryopreservation and genomic DNA extraction as previously described (47).  
407 Briefly, cell cryopreservation was performed in hESCs culture media containing a final  
408 concentration of 40% FBS and 10% DMSO. Cells were slowly frozen in ice-cold freezing  
409 media using Mr. Frosty™ Freezing Container (Thermo Fisher Scientific, 5100-0001). During  
410 the thawing of hESCs, media was supplemented with CloneR (StemCell Technologies,  
411 05889) for 72 hours.

412

413 **Generation and sequencing of pooled amplicons.** Genomic DNA was extracted using  
414 HotShot buffer as previously described (47). The target regions were amplified from gDNA  
415 using locus-specific primers to generate amplicons approximately 150-200 bp in length as  
416 previously described (47). These “first-round” primers contained universal Fluidigm linker  
417 sequences at their 5'-end with the following sequences: Forward primer: 5'-  
418 aactgacgacatggttctaca -3', Reverse primer: 5'- tacggtagcagagacttggtct-3'. Specifically, 20 µl  
419 PCR reactions were set up in 96 well plates using 1U FastStart high fidelity polymerase  
420 (Roche, 3553361001), 2 µl of extracted gDNA as template, 2 µl 10x HF buffer without MgCl<sub>2</sub>,  
421 0.2 mM dNTPs, 0.2 µM primers, and 4.5 mM MgCl<sub>2</sub>, and run on the following programme:  
422 95°C 2 min, followed by 36 cycles of (95°C 20 sec, 64.4°C 20 sec, 72°C 15 sec), 72°C 3  
423 min. In the second round of PCR (indexing PCR), Fluidigm barcoding primers were attached  
424 to the amplicons to uniquely identify each clone. 2 µl linker PCR product diluted 1:10 was  
425 transferred to another 96-well PCR plate to perform this indexing PCR in 20 µl reactions  
426 containing 0.04 µM of Fluidigm barcoding primers (Supplementary Table 1), 2 µl 10x HF  
427 buffer without MgCl<sub>2</sub>, 0.2 mM dNTPs, 4.5 mM MgCl<sub>2</sub>, and 1U FastStart high fidelity  
428 polymerase (Roche, 3553361001). The PCR programme was 95°C 2 min, 16 cycles of  
429 (95°C 20 sec, 60°C 20 sec, 72°C 25 sec), 72°C 3 min. For sequencing library preparation,



430 barcoded PCR products were combined in equal proportion based on estimation of band  
431 intensity on a 2% agarose gel, and the combined pool of PCR products was purified in a  
432 single tube using Ampure XP beads (Beckman-Coulter, A63880) at 1:1 (V/V) to the pooled  
433 sample, and eluted in 25  $\mu$ l of water according to the manufacturer's instructions. Library  
434 purity was confirmed by nanodrop, and final library concentration was measured using the  
435 Qbit fluorometer and diluted to 20 nM. Pooled libraries could be combined with other library  
436 pools adjusted to 20 nM, and the resulting "superpool" volume was adjusted to a final  
437 volume of 20  $\mu$ l before sequencing.

438

439 **Introduction of STOP codon in FTO through HDR-mediated repair.** To target a STOP  
440 codons to an early coding exon of FTO, we designed a ssODN template of 90 bp in length to  
441 be homologous to the target site but to contain single base mismatches to introduce a STOP  
442 codon and to ablate the PAM site to prevent re-cutting by CRIPSR/Cas9 as previously  
443 described (47)(Supplementary Table 1). ssODNs were synthesized (Integrated DNA  
444 Technologies Inc.), dried, and re-suspended in nuclease-free sterile water to a final  
445 concentration of 100  $\mu$ M. Various amounts of ssODNs ranging from 20 pmol to 312.5 pmol  
446 were added to RNP complexes for nucleofection as described above. Editing efficiency was  
447 determined by sequencing the targeted locus using primers outside of the ssODN at the cell  
448 population level rather than in single picked colonies, and then counting the number of reads  
449 corresponding to the WT amplicon sequence, or sequences with one or both desired edits.

450

451 **Project tracking within the GenEditID web framework.** We designed a Python-based web  
452 framework (web app) of GenEditID to facilitate the tracking of different projects, the tracking  
453 of samples within a project, and to facilitate the plate-based data integration and  
454 visualisation to help users identify clones of interest. When initiating a project, the user first  
455 creates a project via the web app (for a screenshot example of the web app home page see  
456 Supplementary Fig. S7) along with comments about the project purpose and design, and

457 then submits an Excel configuration file containing the plate and well each sample originated  
458 from, the CRISPR sequences used, the primers and barcodes used for NGS analysis, and  
459 any other pertinent information (Fig. 1, Supplementary Table 2). This project information is  
460 later accessible via the web app and also programmatically, and enables samples to be  
461 uniquely identified so that data from different analysis modalities (e.g. sequencing, growth  
462 rate, protein abundance) can be loaded into the web app for tracking, integration, and  
463 visualisation. We designed the web app to enable integration with a laboratory information  
464 management system (LIMS) to automatically trigger a sequencing request when sample  
465 information is uploaded. Links to specific LIMS are intentionally omitted from the code  
466 published here since we anticipate that different institutions will wish to implement GenEditID  
467 within existing systems. Analysis can then be run outside the web app using setup scripts  
468 generated from the database, as described in further detail below.

469

470 **Amplicon analysis from NGS data with AmpliCount.** The analysis of barcoded PCR  
471 amplicons is performed outside of the web app using modular scripts  
472 (<https://geneditid.github.io/>) that are adaptable to each user's specific requirements. First,  
473 FASTQ files associated to the project are retrieved and configuration files are created to link  
474 sequencing information with the sample information stored in the GenEditID project  
475 configuration file. These de-multiplexed FASTQ files are then either merged, or joined using  
476 fastq-join if the target size is larger than the read length.

477 To analyse reads, we developed "ampli\_count" (Supplementary Fig. S4), a tool that first  
478 finds amplicons using primer pairs and group variants with same sequence. Then we  
479 identified and filtered out reads of low quality across a 5bp sliding window (average read  
480 quality score < 10). Putative primer dimers were defined as any sequence smaller than the  
481 combined size of the forward and reverse primers, plus 10bp, and discarded. To focus  
482 downstream analysis on variants that reflect CRISPR-Cas9-induced edits rather than  
483 sequencing artefacts, sequences supported by 60 or fewer reads were also discarded. After

484 obtaining “filtered reads” that passed these criteria, amplicon-specific variants were identified  
485 using the tool “variant\_id” to determine variant type and consequence per site by pairwise  
486 alignment to human reference genome ensembl\_grch38 using pairwise2 from Biopython  
487 (<https://github.com/biopython/biopython>), and using varcode  
488 (<https://github.com/openvax/varcode>) and pyensembl  
489 (<https://github.com/openvax/pyensembl>) to determine consequence. Since the aim of this  
490 analysis was to identify clones that carried a high burden of variants likely to lead to loss of  
491 gene function rather than generate a comprehensive description of variants observed upon  
492 gene editing, only variants with an overall frequency of 5% or higher were retained for  
493 downstream analysis. All filter steps and thresholds are tuneable by the user.  
494 Remaining variants were classified according to their predicted consequence  
495 (Supplementary Fig. S4). Variants with multiple predicted consequences following sequence  
496 alignment were labelled “Complex”, or “ComplexFrameShift” if they contained a frameshift.  
497 Consequences were then given an impact weighted score based on their predicted effect on  
498 gene function, ranging from 0 for wild-type sequences to 1 for the gain of a premature stop  
499 codon. Variants were then grouped by similar consequence categories and these combined  
500 frequencies were multiplied by an impact weighting score and summed across all  
501 consequence categories to yield a “gene KO score” for each allele, where a score of 0 would  
502 correspond to all WT sequences, and a score of 1 would correspond to all predicted  
503 deleterious variants (Supplementary Fig. S4). Variant classification and weighting for KO  
504 score calculation can be readily altered via csv file.

505

506 **Clone score integration and data visualisation.** After computing protein KO scores and  
507 gene KO scores, data were loaded back into the GenEditID database to facilitate their  
508 integration with stored sample information. Where both scores were available, the  
509 “integrated KO score” was calculated by taking the product of the gene and protein KO  
510 scores. To facilitate the selection and expansion of candidate KO clones, information about

511 each clones' plate and well position was used to graphically display computed scores as a  
512 "heat map" in 96 well plate format.

513

514 **Statistical analyses.** Statistical analyses were performed using Graph Pad Prism version  
515 8.1.0. A two-tailed Student's *t*-test was performed to compare knock-in efficiencies among  
516 different conditions for variable amount of ssODNs. Unless otherwise stated, data shown  
517 represent the results of at least three independent experiments. P-values < 0.05 were  
518 considered significant.

519

#### 520 **List of abbreviations**

521 GWAS: genome-wide association studies;

522 FTO: fat mass and obesity associated;

523 RPGRIP1L: retinitis pigmentosa GTPase regulator-interacting protein-1 like;

524 IRX3: iroquois homeobox 3;

525 IRX5: iroquois homeobox 5;

526 hPSCs: human pluripotent stem cells;

527 RNP: ribonucleoprotein;

528 gRNA: guide RNA;

529 PAM: protospacer adjacent motif;

530 DSB: double-strand break;

531 NHEJ: non-homologous end-joining;

532 HDR: homology-directed repair;

533 NGS: Next-generation sequencing;

534 KO: knockout;

535 LIMS: laboratory information management system;  
536 ER+: estrogen receptor positive;  
537 STAT3: signal transducer and activator of transcription 3;  
538 ssODN: single-stranded oligodeoxynucleotide;  
539 KOSR: knockout serum replacement;  
540 Bio-Cas9: biotinylated form of Cas9

541

## 542 **DECLARATIONS**

### 543 **Ethics approval and consent to participate**

544 Not applicable

545

### 546 **Consent for publication**

547 Not applicable

548

### 549 **Availability of data and material**

550 The datasets generated and analysed during the current study have been deposited in

551 NCBI's Sequence Read Archive at

552 <https://dataview.ncbi.nlm.nih.gov/object/PRJNA543767?reviewer=ktlduo7ptjcsmrjrhfnj0su>

553 [2](#) (knockout of human *STAT3*);

554 <https://dataview.ncbi.nlm.nih.gov/object/PRJNA543845?reviewer=h1v7go700g7n1ocftv3hckr>

555 [k3m](#) (multiplexed knockout of human *RPGRIP1L*, *FTO*, *IRX3*, and *IRX5*); and

556 <https://dataview.ncbi.nlm.nih.gov/object/PRJNA545266?reviewer=9ptviqm1j6bpfubtjdherr4r0>

557 [8](#) (targeted editing of human *FTO*).

558

### 559 **Competing interests**

560 The authors declare that they have no competing interests.

561

## 562 **Funding**

563 YX is supported by Novo Nordisk China Diabetes Young Scientific Talent Research Funding,  
564 the National Natural Science Foundation of China [81400834]. YCLT is supported by the  
565 Medical Research Council (MRC Metabolic Diseases Unit [MRC\_MC\_UU\_12012.1]). RS is  
566 funded by the Novo Nordisk Foundation [NNF15OC0014136]. FTM is supported by funds  
567 from the Medical Research Council [MR/P501967/1], the Academy of Medical Sciences  
568 [SBF001\1016], the Wellcome Trust and Royal Society [211221/Z/18/Z], and the Chan  
569 Zuckerberg Initiative [191942].

570

## 571 **Authors' contributions**

572 YX, YCLT, and FTM conceived the project and wrote the manuscript with contributions from  
573 all other authors. RS generated data from *STAT3* targeting with the guidance of JC. YX and  
574 YCLT generated data from gene knockout and targeted gene editing of *FTO* and  
575 neighboring genes with the guidance of FTM. AP and CSRC generated the bioinformatics  
576 plots. AP, CSRC, AB and RAF developed bioinformatic tools under the guidance of ME and  
577 AR.

578

## 579 **Acknowledgements**

580 We thank Magdalena Jura and Peter Kirwan for their assistance with culturing hESC lines,  
581 Beata Blaszczyk and Marko Hyvönen for generating and providing purified Cas9 and Cas9-  
582 biotin proteins, Kelly Holmes for generating MCF7 cells stably expressing luciferase and  
583 mStrawberry, and Sir Professor Stephen O'Rahilly for his generous financial support.

584

585

## 586 **FIGURES AND FIGURE LEGENDS**

587 **Figure 1) GenEditID facilitates the management and interpretation of multiplexed gene**  
588 **editing projects.** After the design of CRISPR sequences to target one or multiple genes,  
589 sgRNAs are introduced along with Cas9 to a cell line of choice, which is then subjected to  
590 single-cell cloning by FACS or manual picking. The details of the CRISPR sequences, the  
591 location and plate that identifies each picked clone, the primers used to amplify the targeted  
592 region, any barcodes used to distinguish between PCR amplicons, and any other information  
593 pertaining to experimental conditions is entered into a centralised project and sample  
594 management system to track samples across projects. Next, data from assays across  
595 modalities (e.g. protein analysis by In-Cell Western and mutation analysis by barcoded PCR)  
596 feeds into GenEditID's where it integrates with its sample tracking features and is analysed,  
597 for example to assess the burden of deleterious mutations carried by each clone (gene  
598 KOscore). Scores across these analysis modalities are graphically illustrated to facilitate the  
599 selection and expansion of cell clones for further analysis.

600

601 **Figure 2) Integration of protein- and sequence-based information to inform knockout**  
602 **clone selection. A)** Experimental schematic showing the CRISPR targeting of early  
603 constitutive exons of *STAT3* in the breast cancer cell line MCF7. After gene targeting, cells  
604 were clonally isolated by FACS into 96-well plates that were duplicated to facilitate clone  
605 propagation, protein analysis by In-Cell Western, and the barcoded PCR amplification of the  
606 targeted locus to facilitate deep sequencing and the identification of clones harbouring a  
607 high burden of deleterious (e.g. frameshift) mutations. **B)** Images from an In-Cell Western  
608 experiment where cells were stained for a whole-cell dye and with an anti-STAT3 antibody,  
609 and experiment clones were grown in the inner wells and wild-type controls in opposite  
610 corners (yellow arrows), revealing clones with reduced STAT3 expression (white arrow). **C)**  
611 Most samples have >1000 reads, providing good depth for assessing variant allele  
612 frequency. Low quality, low abundance, or primer dimer reads are discarded from  
613 subsequent analysis. **D)** Distribution of mutation frequencies and consequences across  
614 targeted cell clones used for calculating gene KO scores, where variants with an allele

615 frequency of <5% (grey) do not contribute to these scores. **E,F)** Spatial heat maps of STAT3  
616 protein KO score (E, compare to lower panel in B) and *STAT3* gene KO score. Note that  
617 only a subset of wells from E were analysed by Illumina sequencing (blue circles). **G)** Linear  
618 regression of STAT3 protein KO score and *STAT3* gene KO score shows a strong  
619 correlation ( $R^2=0.79$ ) between these independent measures of gene function. **H)** Heatmap of  
620 the integrated KO score (product of protein and gene KO scores).

621

622 **Figure 3) Multiplexed identification of knockout and knock-in clones by GenEditID. A)**  
623 Schematic showing the spatial location of genes in the human *FTO* locus. **B)** Parallel KO of  
624 multiple genes in separate experiments, the generation of barcoded amplicons, and the  
625 pooling of these barcoded amplicons for multiplexed sequencing. **C)** Mutation allele  
626 frequency per targeted clone for each gene. **D)** Plate-based heat maps showing the location  
627 of clones with high gene KO scores (blue). **E)** Schematic of targeted ssODN-mediate  
628 mutation knock-in (red bases) in the first coding exon of *FTO*, to ablate the CRISPR PAM  
629 sequence (blue) and introduce an early stop codon (red) to ablate protein production. **F)**  
630 Schematic for the systematic modulation of CRISPR conditions and assessment of knock-in  
631 efficiency in un-cloned cell populations. **G)** Calculated knock-in efficiencies revealed a  
632 correlation with ssODN concentration that appeared to peak near 100-125 pmol. n=3 and  
633 n=6 for each concentration for Study 1 and Study 2, respectively.

634

635

### 636 **SUPPLEMENTARY FIGURES**

637 **Supplementary Figure S1. Validation of GenEditID with the clonal selection of *STAT3***  
638 **KO lines. A)** A schematic diagram depicting the site-specific CRISPR designs to target exon  
639 3 or 4 of the human *STAT3* gene. **B)** *STAT3* protein expression by Fluorescent Western blot  
640 confirmed that *STAT3* (green) was effectively knocked down in the MCF7 cells. Actin (red)  
641 was used as loading control. **C)** Comparison of growth rate with loss of *STAT3* protein  
642 expression (ratio to total cell stain) and presence of insertion/deletion mutations (indels) in



643 Sanger sequencing data. **D)** Sanger sequencing at the target site showing sequence  
644 chromatograms for clone B6 from plate 4 (right) showing an “A” insertion introduces a  
645 premature STOP codon. Clone E2 from plate 1 (left) as an example of STAT3 wild type at  
646 the corresponding locus.

647

648 **Supplementary Figure S2. PCR amplicon barcoding and pooling for NGS. A)** Genomic  
649 DNA is extracted from cell clones 96 well plates that were duplicated from another plate  
650 which is maintained or frozen. **B)** The CRISPR-targeted region is PCR amplified with locus-  
651 specific primers containing universal (L1 and L2) linker sequences (orange box). **C)** In a  
652 second PCR cycle (blue box), one of 96 unique Fluidigm forward barcodes are added to the  
653 end of the PCR product. To further increase the multiplexing capacity, up to 96 distinct  
654 reverse barcodes can be used. The resulting barcoded amplicons are then concentration  
655 normalised, pooled, and sequenced on the Illumina MiSeq in the presence of PhiX to  
656 increase library diversity.

657

658 **Supplementary Figure S3. Amplicon sequencing coverage and criteria used for**  
659 **variant quality control.** Log<sub>10</sub>-transformed distribution of read depth (A) and variant  
660 frequency (B) at one of the two PCR amplicons generated at the human *STAT3* locus,  
661 showing criteria for inclusion for downstream analysis: minimum read depth >1000 after  
662 filtering (A), and minimum variant allele frequency >5% (B).

663

664 **Supplementary Figure S4. Schematic flowchart of steps involved in variant calling and**  
665 **annotation by AmpliCount.** Throughout this flowchart, green indicates data outputs,  
666 orange indicates tools or file inputs, and processing steps are indicated in white. FASTQ files  
667 are first demultiplexed and reads are combined by merging or joining, depending on  
668 amplicon length (please see Materials and Methods). The “ampli\_count” tool then filters out  
669 reads with low sequence quality, reads likely corresponding to primer dimers, and reads

670 corresponding to low abundance (e.g. <60 reads) sequences to retain filtered reads from  
671 which variant frequencies are computed. The “variant\_id” tool then removes all reads that  
672 have low abundance (e.g. <5%) relative to all filtered reads to streamline downstream  
673 alignment and variant classification steps. Remaining variants are pairwise-aligned,  
674 classified by variant consequence, scored as indicated. Variants in the same consequence  
675 categories are combined, and the combined frequencies are multiplied by the consequence  
676 scores and summed to yield gene KO scores for each clone (see also Fig. 1). The resulting  
677 data outputs include plots and tables, including graphical visualisation of gene KO scores in  
678 plate-based heat maps.

679

680 **Supplementary Figure S5. Multiplexed analysis of CRISPR targeting of the human *FTO***

681 **locus. A)** SNPs within intron 1 of *FTO* have a strong association with obesity, implicating the  
682 causal involvement of several nearby genes. **B)** Representative gel image of an *in vitro*  
683 cleavage assay evaluating gRNA:Cas9-mediated target cleavage. The arrowheads indicate  
684 nuclease cleaved products. **C)** Schema of the CRISPR RNA targeting early conserved  
685 coding exons in four candidate genes in the *FTO* locus. The CRISPR recognition sequence  
686 is shown in red and the PAM sequence is shown in blue. **D)** Log<sub>10</sub>-transformed sequencing  
687 depth per barcode of the four targeted sequenced and analysed in parallel indicating ample  
688 sequence quality and depth for variant analysis.

689

690 **Supplementary Figure S6. A)** Results from an *in vitro* Cas9 cutting assay where a

691 biotinylated form of Cas9 (Bio-Cas9) was mixed with a biotinylated-ssODN and streptavidin  
692 was added at increasing concentrations to physically link Cas9 and the ssODN repair oligo,  
693 but this approach appeared to disrupt cutting ability, as indicated by the lower molecular  
694 weight bands observed with non-biotinylated (WT) Cas9. **B)** All hESC cell lines were tested  
695 for mycoplasma before and after gene editing and found to be negative.

696

697 **Supplementary Figure S7.** A screenshot of an example of the homepage of the Web App in  
698 the web browser to facilitate the tracking of different projects. Some key features of the Web  
699 App including “Create project” which enables the creation of a new project. “edit” allows the  
700 uploading of the configuration file that are subsequently loaded into the database to facilitate  
701 sample tracking. “view” displays target amplicon and a list of the samples. “ngs data” house  
702 all the resulting data outputs including the csv tables and plots.

703

#### 704 **SUPPLEMENTARY TABLES**

705 **Supplementary Table 1. Compilation of primer, barcode, CRISPR and ssODN**  
706 **sequences used in this study.** The table contains all the sequence information used in all  
707 the studies covered in this manuscript, including the CRISPR guide RNA sequences, target  
708 primer sequences used for the *in vitro* Cas9 cutting assay and target primer sequences for  
709 the first round (linker) PCR for NGS. The ssODN sequence is complementary to the *FTO*  
710 target region and carries mutations to introduce a premature STOP codon and a mutation to  
711 disrupt the PAM site to prevent further CRISPR-Cas9 activity.

712

713 **Supplementary Table 2. Example of a configuration file used to submit and track**  
714 **samples.** An example of a configuration file that are submitted by the user when initiating a  
715 project that contains all the relevant information from the user including the CRISPR  
716 sequences used, primers sequences for NGS analysis and sample coordination on the plate.  
717 All the information in the configuration file is later accessible via the web app allowing  
718 samples to be uniquely identified for tracking, integration and visualisation.

719

720 **Supplementary Table 3. Amplicon data from the human *STAT3* locus generated with**  
721 **AmpliCount.** “Config *STAT3*” contains the information including the target genomic location  
722 and the two sets of primers use to identify the two amplicons of interest. “variantid *STAT3*”  
723 contains the total reads after each step of the filtering process to remove reads with low  
724 quality, short length (primer dimers), or low abundance, and provides information on the

725 variant frequency, type and consequence to give a variant score where the score is the  
726 consequence weight x variant frequency. “**impact STAT3**” tablet the combined frequency of  
727 all variants with identical consequence categories (high/medium/low impact). Finally, the  
728 “**koscores\_amplicon**” provides individual table for each amplicon (i.e. STAT3 exon3 &  
729 exon4) on variants grouped in each consequence categories (i.e. variant with identical  
730 impact weighing) and their combined frequencies to yield a gene KO score where the score  
731 is the sum of impact weight x impact frequency for each allele and a score of 1 would  
732 correspond to all deleterious variants.

733

734 **Supplementary Table 4. Amplicon data from the human *FTO* locus generated with**  
735 **AmpliCount. “Config *FTO plus*”** contains the genomic location and the primer pairs use to  
736 identify the four target gene of interest, namely *FTO*, *IRX3*, *IRX5* and *RPGRIP1L*. “**variantid**  
737 ***FTO plus***” table contains all total reads for each barcode and sequences reads after each  
738 step of the filtering process such as reads with low quality, primer dimers, low abundance,  
739 and lists the variant type and consequence to give a variant score. “**impact *FTO plus***”  
740 shows data on the combined frequency of all variants with identical consequence weighing  
741 and categories the consequence into high/medium/low impact. “**koscores\_amplicon**” tablet  
742 each of the four amplicons included in this study and provides data on variants grouped by  
743 same consequences categories and their combined frequencies to yield a gene KO score for  
744 each allele where a score of 1 would correspond to all deleterious variants.

745

746 **Supplementary Table 5. Targeted editing with ssODNs to introduce targeted**  
747 **mutations into *FTO*.** “**config ssODN**” lists the four types of variant sequence that were  
748 tested for, namely the wild-type *FTO* sequence, the sequence with both target sites mutated,  
749 the variant sequence with target site only where a STOP codon was introduced in the early  
750 coding exon of *FTO* and sequence where only the PAM site was mutated. “**amplicount**  
751 **Study 1**” shows the total and filtered (e.g. matching target sequences named above)  
752 sequencing reads in eight cell populations gene edited with either WT Cas9 or Cas9-biotin

753 proteins (for ssODN concentration of 20 pmol, 50 pmol, 125 pmol and 312.5 pmol; n=3 for  
754 each condition). “**amplicount Study 2**” shows the total and filtered sequencing reads in  
755 another independent four groups of un-cloned cell populations (for ssODN concentration of 0  
756 pmol, 50 pmol, 100 pmol and 200 pmol; n=6 for each condition). “**KoIN Study 1**” and “**KoIN**  
757 **study 2**” shows the calculated knock-in efficiencies for Study 1 and Study 2 respectively  
758 where the % of HDR efficiency were represented by the percentage of specific variant  
759 filtered read over the sum of all filtered reads for each barcode.

760

## 761 REFERENCES

- 762 1. McCarroll SA, Kuruvilla FG, Korn JM, Cawley S, Nemesh J, Wysoker A, et al. Integrated  
763 detection and population-genetic analysis of SNPs and copy number variation. *Nat*  
764 *Genet.* 2008;40(10):1166-74.
- 765 2. Hirschhorn JN. Genetic approaches to studying common diseases and complex traits.  
766 *Pediatr Res.* 2005;57(5 Pt 2):74R-7R.
- 767 3. Johnson GC, Todd JA. Strategies in complex disease mapping. *Curr Opin Genet Dev.*  
768 2000;10(3):330-4.
- 769 4. Welter D, MacArthur J, Morales J, Burdett T, Hall P, Junkins H, et al. The NHGRI  
770 GWAS Catalog, a curated resource of SNP-trait associations. *Nucleic Acids Res.*  
771 2014;42(Database issue):D1001-6.
- 772 5. MacArthur DG, Manolio TA, Dimmock DP, Rehm HL, Shendure J, Abecasis GR, et al.  
773 Guidelines for investigating causality of sequence variants in human disease. *Nature.*  
774 2014;508(7497):469-76.
- 775 6. Maurano MT, Humbert R, Rynes E, Thurman RE, Haugen E, Wang H, et al. Systematic  
776 localization of common disease-associated variation in regulatory DNA. *Science.*  
777 2012;337(6099):1190-5.

- 778 7. Cecil JE, Tavendale R, Watt P, Hetherington MM, Palmer CN. An obesity-associated  
779 FTO gene variant and increased energy intake in children. *N Engl J Med.*  
780 2008;359(24):2558-66.
- 781 8. Speakman JR, Rance KA, Johnstone AM. Polymorphisms of the FTO gene are  
782 associated with variation in energy intake, but not energy expenditure. *Obesity (Silver*  
783 *Spring).* 2008;16(8):1961-5.
- 784 9. Wardle J, Carnell S, Haworth CM, Farooqi IS, O'Rahilly S, Plomin R. Obesity  
785 associated genetic variation in FTO is associated with diminished satiety. *J Clin*  
786 *Endocrinol Metab.* 2008;93(9):3640-3.
- 787 10. Wardle J, Llewellyn C, Sanderson S, Plomin R. The FTO gene and measured food  
788 intake in children. *Int J Obes (Lond).* 2009;33(1):42-5.
- 789 11. Jacobsson JA, Schioth HB, Fredriksson R. The impact of intronic single nucleotide  
790 polymorphisms and ethnic diversity for studies on the obesity gene FTO. *Obesity*  
791 *reviews : an official journal of the International Association for the Study of Obesity.*  
792 2012;13(12):1096-109.
- 793 12. Sovio U, Mook-Kanamori DO, Warrington NM, Lawrence R, Briollais L, Palmer CN, et  
794 al. Association between common variation at the FTO locus and changes in body mass  
795 index from infancy to late childhood: the complex nature of genetic association through  
796 growth and development. *PLoS genetics.* 2011;7(2):e1001307.
- 797 13. Stratigopoulos G, Burnett LC, Rausch R, Gill R, Penn DB, Skowronski AA, et al.  
798 Hypomorphism of Fto and Rpgrip1l causes obesity in mice. *J Clin Invest.*  
799 2016;126(5):1897-910.
- 800 14. Stratigopoulos G, Martin Carli JF, O'Day DR, Wang L, Leduc CA, Lanzano P, et al.  
801 Hypomorphism for RPGRIP1L, a ciliary gene vicinal to the FTO locus, causes increased  
802 adiposity in mice. *Cell metabolism.* 2014;19(5):767-79.

- 803 15. Wang L, De Solis AJ, Goffer Y, Birkenbach KE, Engle SE, Tanis R, et al. Ciliary gene  
804 RPGRIP1L is required for hypothalamic arcuate neuron development. *JCI Insight*.  
805 2019;4(3).
- 806 16. Claussnitzer M, Dankel SN, Kim KH, Quon G, Meuleman W, Haugen C, et al. FTO  
807 Obesity Variant Circuitry and Adipocyte Browning in Humans. *N Engl J Med*.  
808 2015;373(10):895-907.
- 809 17. Smemo S, Tena JJ, Kim KH, Gamazon ER, Sakabe NJ, Gomez-Marin C, et al. Obesity-  
810 associated variants within FTO form long-range functional connections with IRX3.  
811 *Nature*. 2014;507(7492):371-5.
- 812 18. Merkle FT, Eggan K. Modeling human disease with pluripotent stem cells: from genome  
813 association to function. *Cell stem cell*. 2013;12(6):656-68.
- 814 19. Sandoe J, Eggan K. Opportunities and challenges of pluripotent stem cell  
815 neurodegenerative disease models. *Nature neuroscience*. 2013;16(7):780-9.
- 816 20. Cohen DE, Melton D. Turning straw into gold: directing cell fate for regenerative  
817 medicine. *Nat Rev Genet*. 2011;12(4):243-52.
- 818 21. Murry CE, Keller G. Differentiation of embryonic stem cells to clinically relevant  
819 populations: lessons from embryonic development. *Cell*. 2008;132(4):661-80.
- 820 22. Kirwan P, Jura M, Merkle FT. Generation and Characterization of Functional Human  
821 Hypothalamic Neurons. *Current protocols in neuroscience*. 2017;81:3.33.1-3..24.
- 822 23. Merkle FT, Maroof A, Wataya T, Sasai Y, Studer L, Eggan K, et al. Generation of  
823 neuropeptidergic hypothalamic neurons from human pluripotent stem cells.  
824 *Development (Cambridge, England)*. 2015;142(4):633-43.
- 825 24. Cong L, Ran FA, Cox D, Lin S, Barretto R, Habib N, et al. Multiplex genome engineering  
826 using CRISPR/Cas systems. *Science*. 2013;339(6121):819-23.

- 827 25. Mali P, Yang L, Esvelt KM, Aach J, Guell M, DiCarlo JE, et al. RNA-guided human  
828 genome engineering via Cas9. *Science*. 2013;339(6121):823-6.
- 829 26. Zetsche B, Gootenberg JS, Abudayyeh OO, Slaymaker IM, Makarova KS,  
830 Essletzbichler P, et al. Cpf1 is a single RNA-guided endonuclease of a class 2 CRISPR-  
831 Cas system. *Cell*. 2015;163(3):759-71.
- 832 27. Esvelt KM, Mali P, Braff JL, Moosburner M, Yaung SJ, Church GM. Orthogonal Cas9  
833 proteins for RNA-guided gene regulation and editing. *Nature methods*.  
834 2013;10(11):1116-21.
- 835 28. Jinek M, Chylinski K, Fonfara I, Hauer M, Doudna JA, Charpentier E. A programmable  
836 dual-RNA-guided DNA endonuclease in adaptive bacterial immunity. *Science*.  
837 2012;337(6096):816-21.
- 838 29. Wang T, Wei JJ, Sabatini DM, Lander ES. Genetic screens in human cells using the  
839 CRISPR-Cas9 system. *Science*. 2014;343(6166):80-4.
- 840 30. Pastwa E, Blasiak J. Non-homologous DNA end joining. *Acta biochimica Polonica*.  
841 2003;50(4):891-908.
- 842 31. Aizawa E, Hirabayashi Y, Iwanaga Y, Suzuki K, Sakurai K, Shimoji M, et al. Efficient  
843 and accurate homologous recombination in hESCs and hiPSCs using helper-dependent  
844 adenoviral vectors. *Mol Ther*. 2012;20(2):424-31.
- 845 32. Canver MC, Haeussler M, Bauer DE, Orkin SH, Sanjana NE, Shalem O, et al.  
846 Integrated design, execution, and analysis of arrayed and pooled CRISPR genome-  
847 editing experiments. *Nature protocols*. 2018;13(5):946-86.
- 848 33. Lindsay H, Burger A, Biyong B, Felker A, Hess C, Zaugg J, et al. CrispRVariants charts  
849 the mutation spectrum of genome engineering experiments. *Nature biotechnology*.  
850 2016;34(7):701-2.



- 851 34. Pinello L, Canver MC, Hoban MD, Orkin SH, Kohn DB, Bauer DE, et al. Analyzing  
852 CRISPR genome-editing experiments with CRISPResso. *Nature biotechnology*.  
853 2016;34(7):695-7.
- 854 35. Labun K, Guo X, Chavez A, Church G, Gagnon JA, Valen E. Accurate analysis of  
855 genuine CRISPR editing events with ampliCan. *Genome research*. 2019.
- 856 36. Harrod A, Fulton J, Nguyen VTM, Periyasamy M, Ramos-Garcia L, Lai CF, et al.  
857 Genomic modelling of the ESR1 Y537S mutation for evaluating function and new  
858 therapeutic approaches for metastatic breast cancer. *Oncogene*. 2017;36(16):2286-96.
- 859 37. Yuan J, Zhang F, Niu R. Multiple regulation pathways and pivotal biological functions of  
860 STAT3 in cancer. *Scientific reports*. 2015;5:17663.
- 861 38. Rattanapornsompong K, Ngamkham J, Chavalit T, Jitrapakdee S. Generation of Human  
862 Pyruvate Carboxylase Knockout Cell Lines Using Retrovirus Expressing Short Hairpin  
863 RNA and CRISPR-Cas9 as Models to Study Its Metabolic Role in Cancer Research.  
864 *Methods in molecular biology* (Clifton, NJ). 2019;1916:273-88.
- 865 39. Narayan M, Peralta DA, Gibson C, Zitnyar A, Jinwal UK. An optimized InCell Western  
866 screening technique identifies hexachlorophene as a novel potent TDP43 targeting  
867 drug. *Journal of biotechnology*. 2015;207:34-8.
- 868 40. Fu Y, Foden JA, Khayter C, Maeder ML, Reyon D, Joung JK, et al. High-frequency off-  
869 target mutagenesis induced by CRISPR-Cas nucleases in human cells. *Nature*  
870 *biotechnology*. 2013;31(9):822-6.
- 871 41. Merkle FT, Neuhausser WM, Santos D, Valen E, Gagnon JA, Maas K, et al. Efficient  
872 CRISPR-Cas9-mediated generation of knockin human pluripotent stem cells lacking  
873 undesired mutations at the targeted locus. *Cell reports*. 2015;11(6):875-83.

- 874 42. Liu Y, Rao M. Gene targeting in human pluripotent stem cells. *Methods in molecular*  
875 *biology* (Clifton, NJ). 2011;767:355-67.
- 876 43. Zwaka TP, Thomson JA. Homologous recombination in human embryonic stem cells.  
877 *Nature biotechnology*. 2003;21(3):319-21.
- 878 44. Haapaniemi E, Botla S, Persson J, Schmierer B, Taipale J. CRISPR-Cas9 genome  
879 editing induces a p53-mediated DNA damage response. *Nature medicine*.  
880 2018;24(7):927-30.
- 881 45. Ihry RJ, Worringer KA, Salick MR, Frias E, Ho D, Theriault K, et al. p53 inhibits  
882 CRISPR-Cas9 engineering in human pluripotent stem cells. *Nature medicine*.  
883 2018;24(7):939-46.
- 884 46. Tu Z, Yang W, Yan S, Yin A, Gao J, Liu X, et al. Promoting Cas9 degradation reduces  
885 mosaic mutations in non-human primate embryos. *Scientific reports*. 2017;7:42081.
- 886 47. Santos DP, Kiskinis E, Eggan K, Merkle FT. Comprehensive Protocols for  
887 CRISPR/Cas9-based Gene Editing in Human Pluripotent Stem Cells. *Current protocols*  
888 *in stem cell biology*. 2016;38:5b.6.1-5b.6.60.
- 889 48. Raj B, Gagnon JA, Schier AF. Large-scale reconstruction of cell lineages using single-  
890 cell readout of transcriptomes and CRISPR-Cas9 barcodes by scGESTALT. *Nature*  
891 *protocols*. 2018;13(11):2685-713.
- 892 49. Eiges R, Schuldiner M, Drukker M, Yanuka O, Itskovitz-Eldor J, Benvenisty N.  
893 Establishment of human embryonic stem cell-transfected clones carrying a marker for  
894 undifferentiated cells. *Curr Biol*. 2001;11(7):514-8.
- 895 50. Savic N, Ringnalda FC, Lindsay H, Berk C, Bargsten K, Li Y, et al. Covalent linkage of  
896 the DNA repair template to the CRISPR-Cas9 nuclease enhances homology-directed  
897 repair. *eLife*. 2018;7.

- 898 51. Thorvaldsdottir H, Robinson JT, Mesirov JP. Integrative Genomics Viewer (IGV): high-  
899 performance genomics data visualization and exploration. *Brief Bioinform.*  
900 2013;14(2):178-92.
- 901 52. Goodwin S, McPherson JD, McCombie WR. Coming of age: ten years of next-  
902 generation sequencing technologies. *Nat Rev Genet.* 2016;17(6):333-51.
- 903 53. Frayling TM, Timpson NJ, Weedon MN, Zeggini E, Freathy RM, Lindgren CM, et al. A  
904 common variant in the FTO gene is associated with body mass index and predisposes  
905 to childhood and adult obesity. *Science.* 2007;316(5826):889-94.
- 906 54. Scuteri A, Sanna S, Chen WM, Uda M, Albai G, Strait J, et al. Genome-wide association  
907 scan shows genetic variants in the FTO gene are associated with obesity-related traits.  
908 *PLoS genetics.* 2007;3(7):e115.
- 909 55. Yeo GS, Heisler LK. Unraveling the brain regulation of appetite: lessons from genetics.  
910 *Nature neuroscience.* 2012;15(10):1343-9.
- 911 56. Gagnon JA, Valen E, Thyme SB, Huang P, Akhmetova L, Pauli A, et al. Efficient  
912 mutagenesis by Cas9 protein-mediated oligonucleotide insertion and large-scale  
913 assessment of single-guide RNAs. *PLoS One.* 2014;9(5):e98186.
- 914

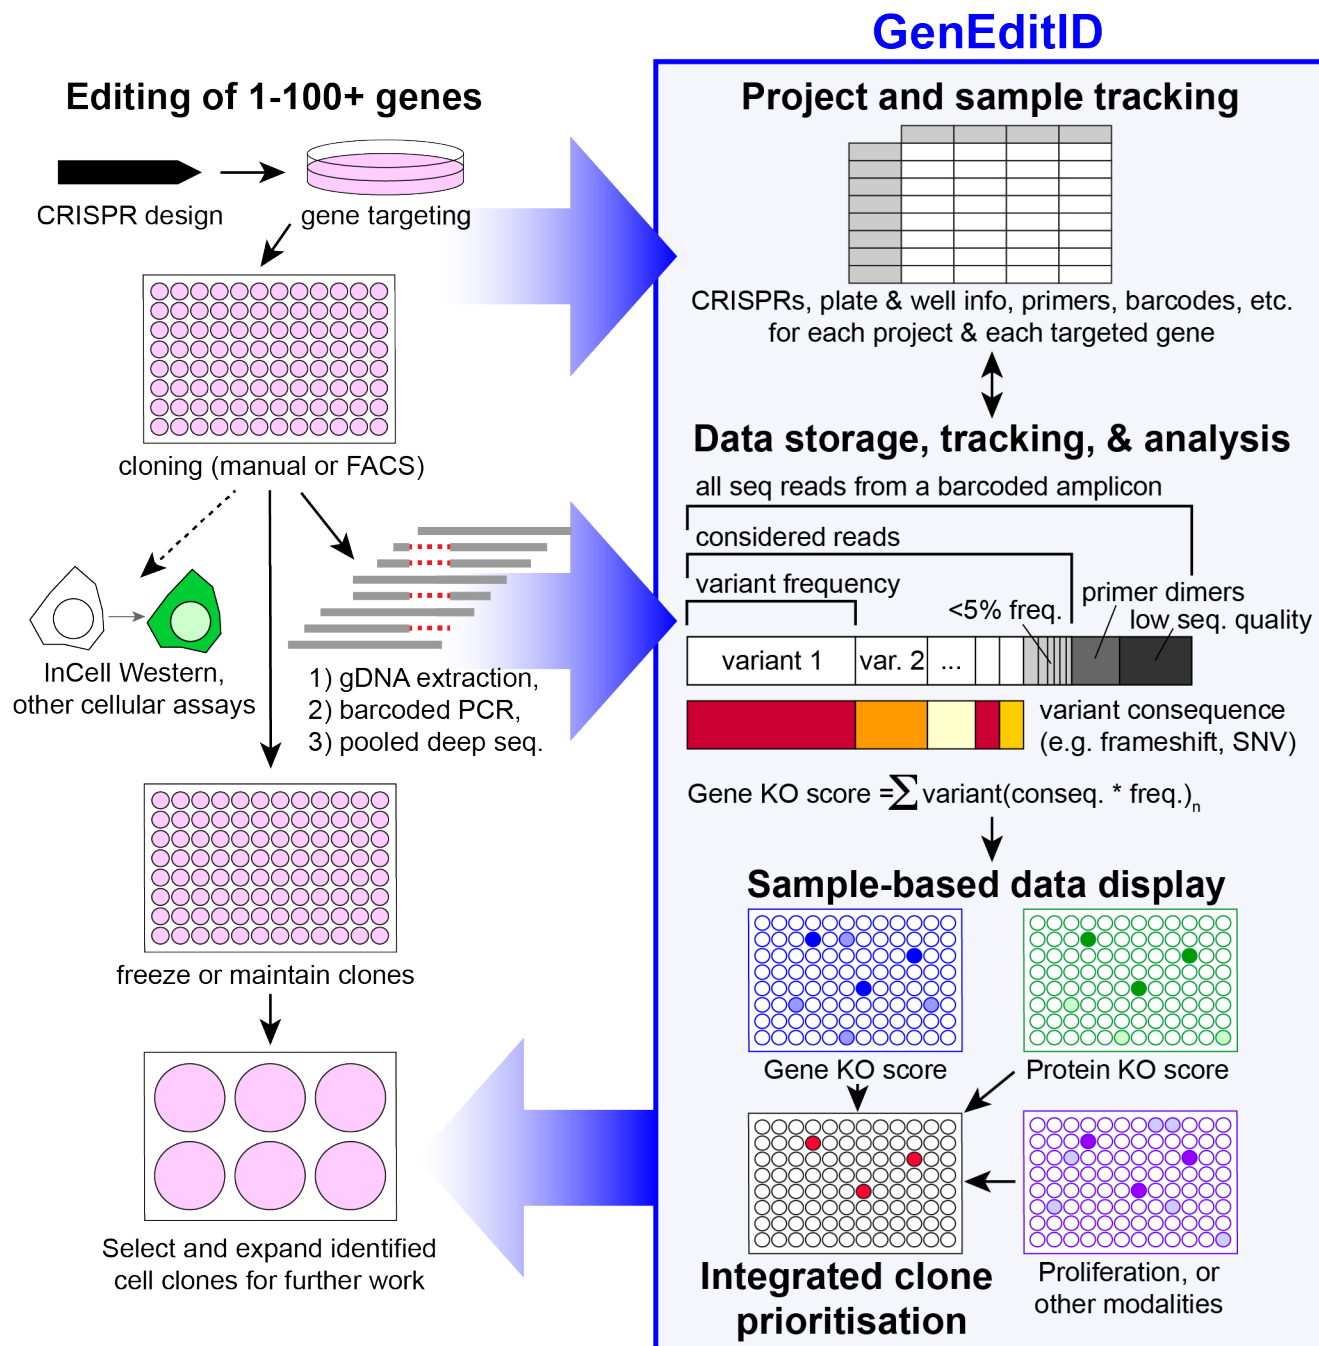

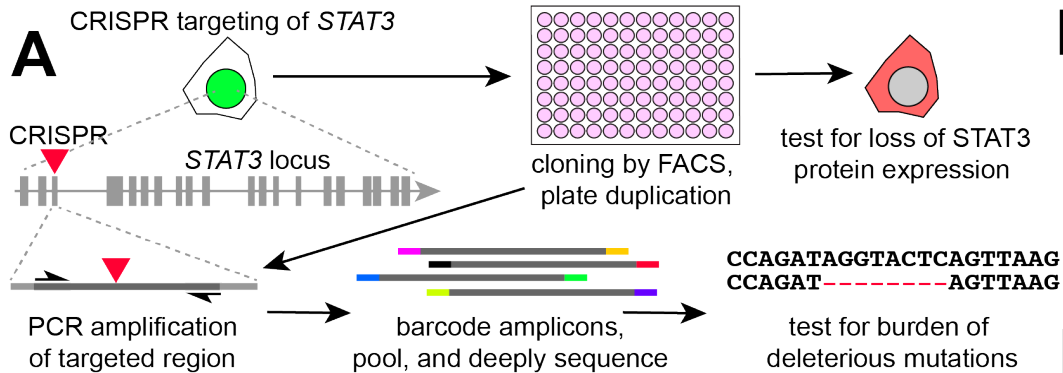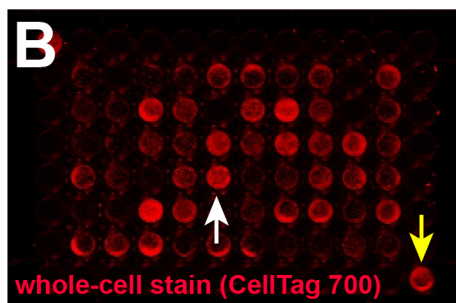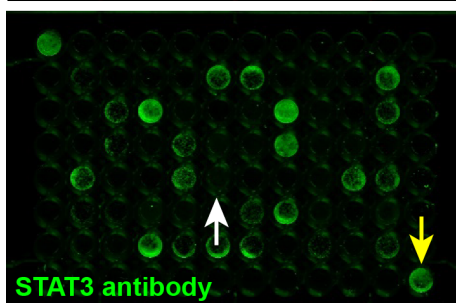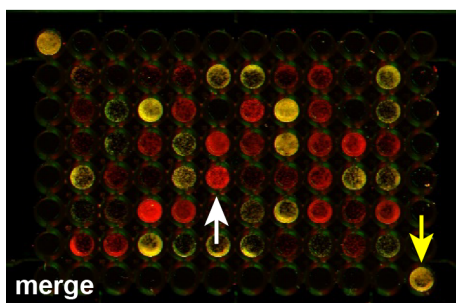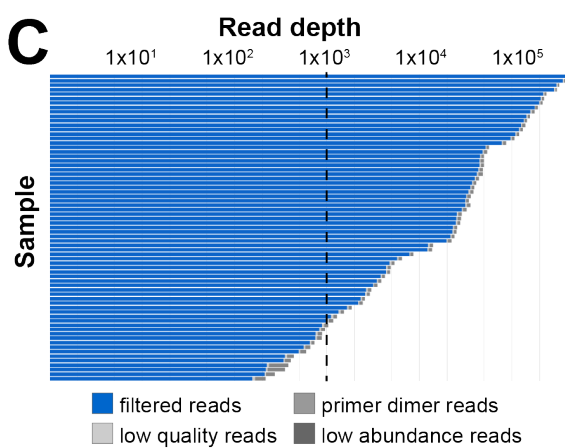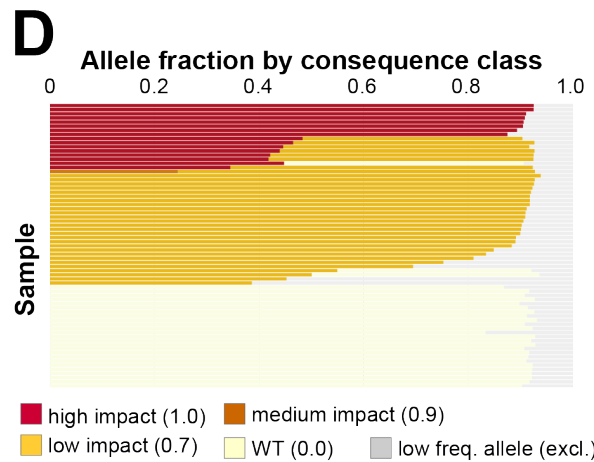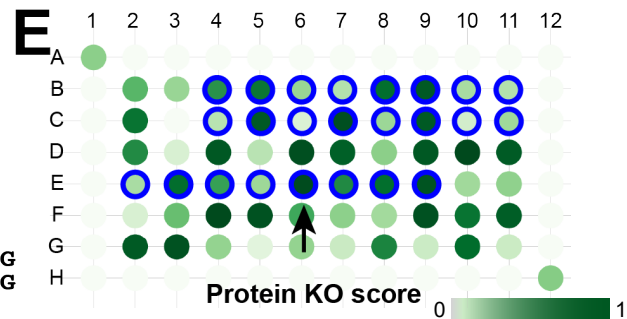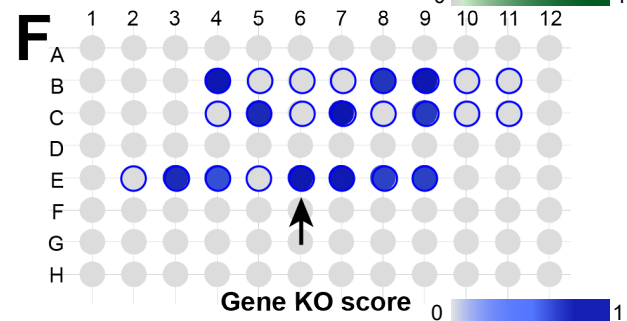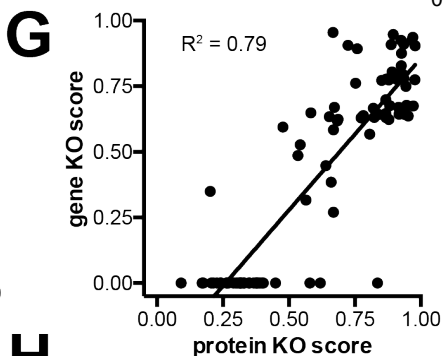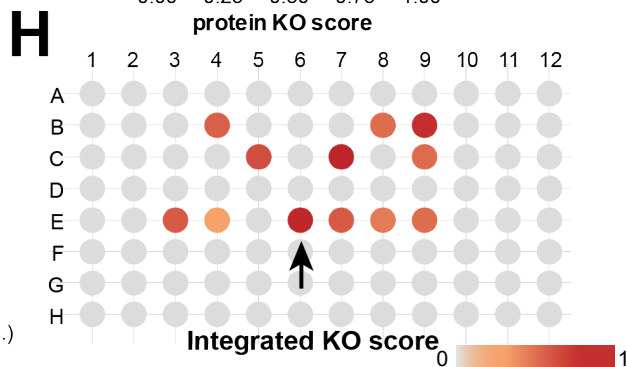

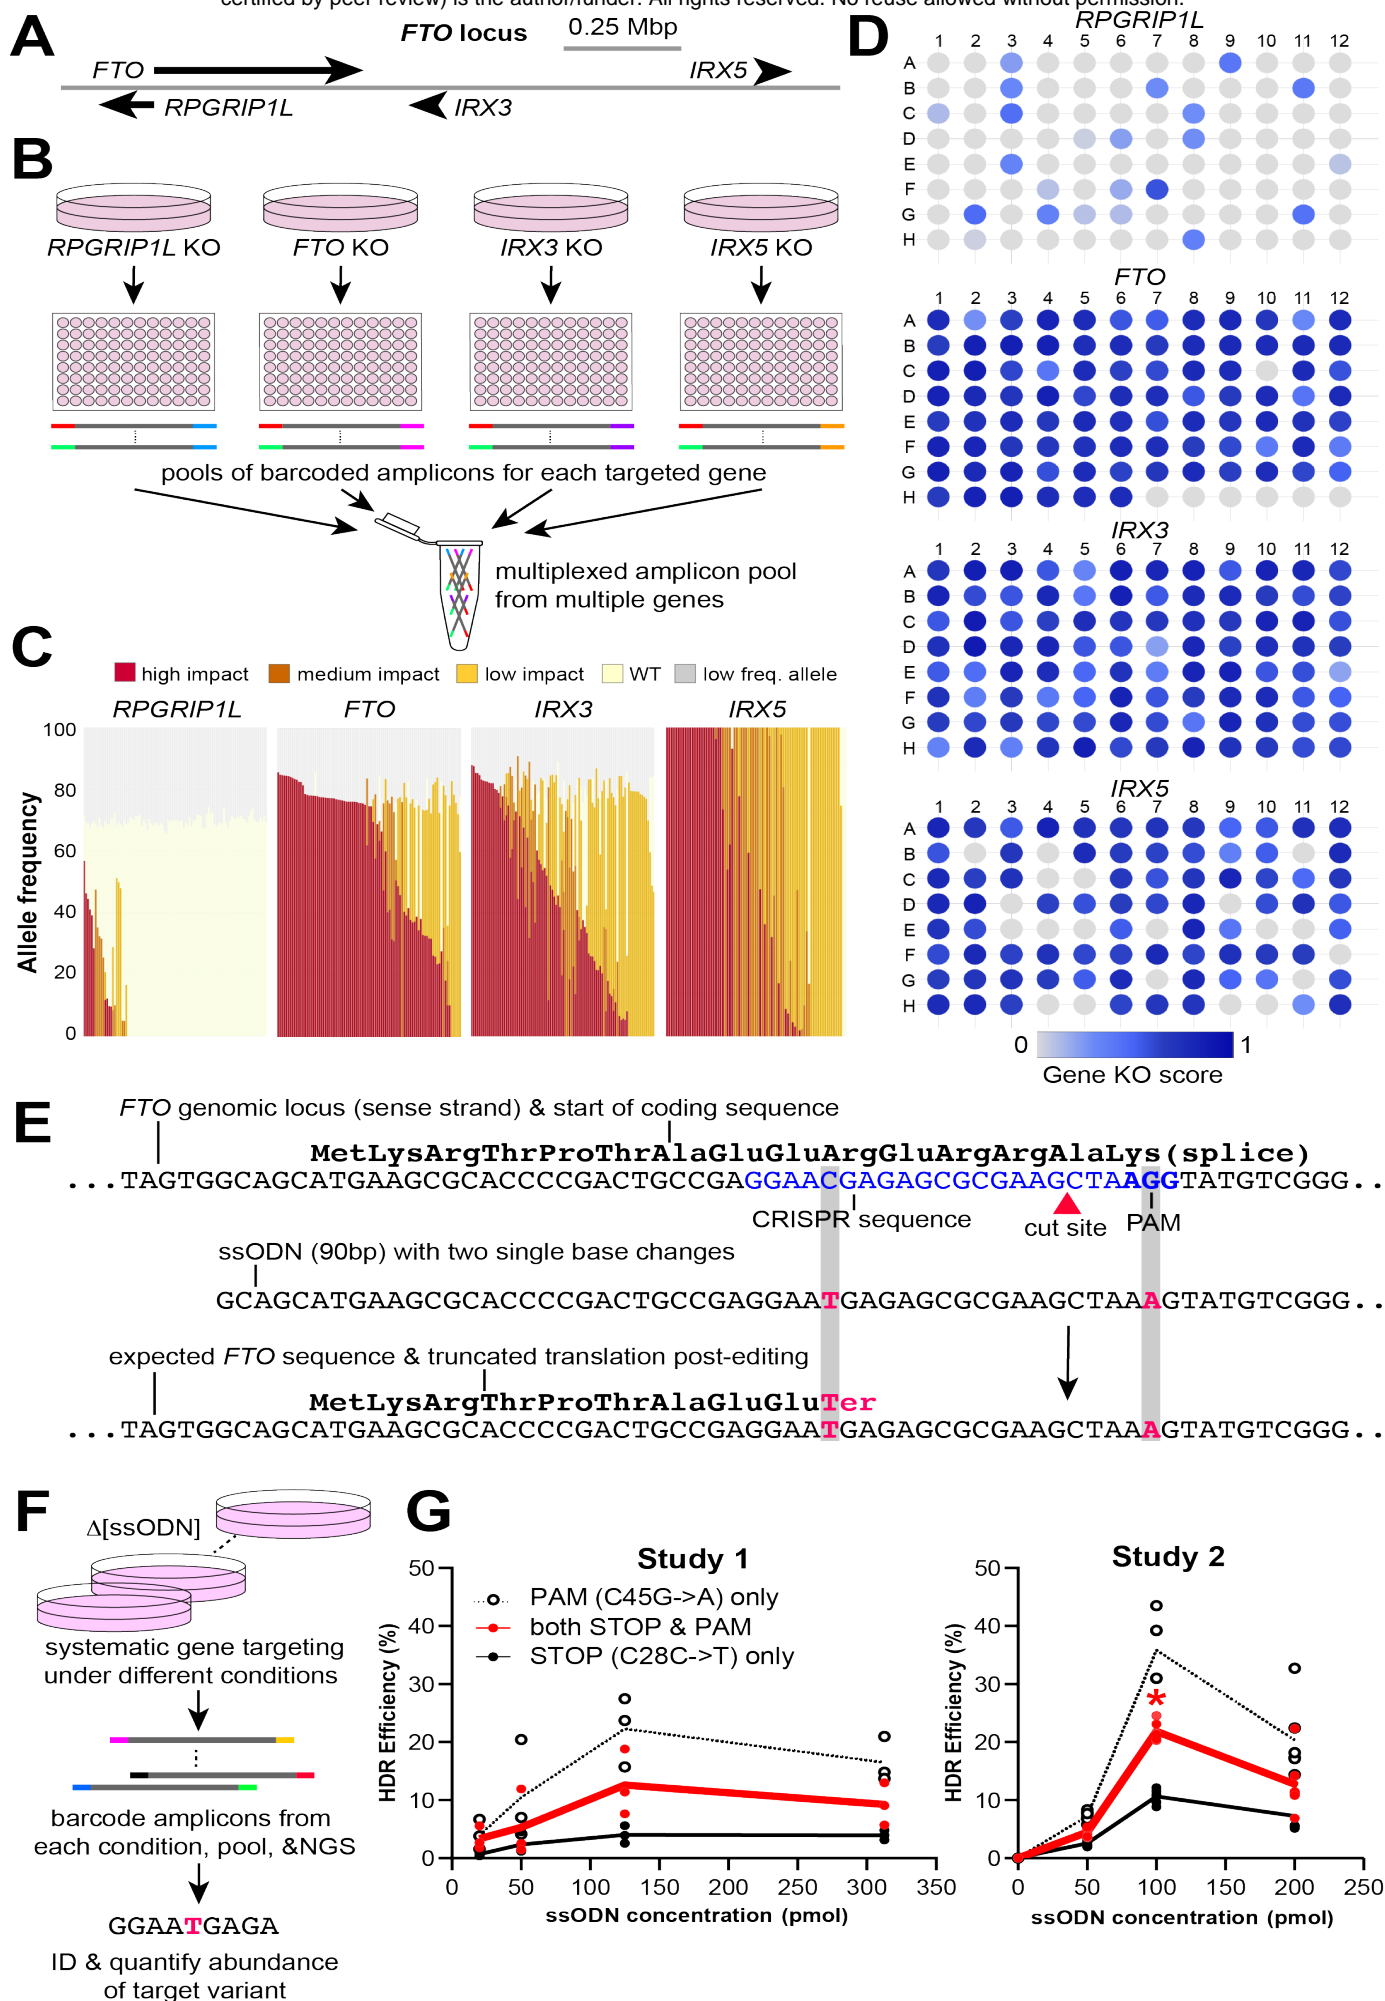

Source: https://biorxiv.org/content/biorxiv/early/2019/06/13/657650.full-text.pdf
